1 **The association between alcohol consumption and**  
2 **telomere length: A meta-analysis focusing on**  
3 **observational studies**

4

5

6 Jianqiang Li<sup>1,2¶</sup>, Yu Guan<sup>1¶</sup>, Faheem Akhtar<sup>1,3</sup>, Xi Xu<sup>1</sup>, Ji-Jiang Yang<sup>4\*</sup>, Shi Chen<sup>5</sup>,  
7 Qing Wang<sup>4</sup>, Hui Pan<sup>5</sup>, Weiliang Qiu<sup>6</sup>

8

9 <sup>1</sup> Faculty of Information Technology, Beijing University of Technology, Beijing,  
10 China.

11 <sup>2</sup> Beijing Engineering Research Center for IoT Software and Systems, Beijing, China.

12 <sup>3</sup> Department of Computer Science, Sukkur IBA University, Sukkur, Sindh, Pakistan.

13 <sup>4</sup> Tsinghua National Laboratory for Information Science and Technology, Tsinghua  
14 University, Beijing, China.

15 <sup>5</sup> Department of Endocrinology, Peking Union Medical College Hospital, Chinese  
16 Academy of Medical Sciences & Peking Union Medical College, Beijing, China.

17 <sup>6</sup> Channing Division of Network Medicine, Brigham and Women's Hospital/Harvard  
18 Medical School, Boston, USA.

19

20 ¶These authors contributed equally to this work.

21

22 \*Corresponding author:

23 E-mail: [Jijiang\\_Yang@126.com](mailto:Jijiang_Yang@126.com) (JY)



## 25 **Abstract**

## 26 **Background**

27 Both telomere length and alcohol consumption play important roles in carcinogenesis  
28 and biological age. Many efforts have been made to investigate the association  
29 between alcohol consumption and telomere length. However, no consensus has been  
30 reached yet.

## 31 **Methods**

32 In this article, we performed a meta-analysis to integrate the investigation results in  
33 the literature about the association between alcohol consumption and telomere length.  
34 After searching articles published between 2000 and 2016, 21 articles (including 27  
35 analyses, total sample size 35,891) met our eligibility criteria.

## 36 **Results**

37 We found a significant association between alcohol consumption and telomere length  
38 (Fisher's combined p-value = 3.52E-8 and Liptak's weighted p-value = 8.24E-3). We  
39 also found that the significance of the association between alcohol consumption and  
40 telomere length varies with study type (cohort, case-control, or cross-sectional) and  
41 study population (Europe, Asia, American, or Australia).

## 42 **Conclusions**

43 Combined evidence showed that alcohol consumption is associated with telomere  
44 length. The consistent quantifications of alcohol consumption and telomere length  
45 would benefit the future aggregation of the evidence from different studies.

46

47

## 48 **Introduction**

49 A telomere is a segment of repetitive nucleotide sequences at both tails of a  
50 chromosome, which protects the tail of the chromosome from deterioration or fusion  
51 with neighboring chromosomes[1]. Over time, the end of the chromosome becomes  
52 shorter during cell replications[1]. Once the telomere length (TL) is shortened to a  
53 critical length, the chromosomes would become unstable and the cells will  
54 immediately activate the apoptotic mechanism and lose viability[2]. So TL reflects the  
55 cell copy history and replication potential, known as the "mitotic clock" of the cell's  
56 lifespan[1]. Defects in telomere length have been linked to several age-related  
57 diseases, premature aging syndromes, and cancers[3]. Telomere shortening may result  
58 in genomic instability during the initial stage of tumorigenesis[4].

59  
60 Although telomere shortening occurs as a natural part of aging, it is known to be  
61 affected by several factors including age, gender, ethnicity, paternal age at birth,  
62 genetic mutations of telomerase, and telomere maintenance genes[5]. Telomere  
63 shortening also could be accelerated by mechanisms like oxidative stress and  
64 inflammation[5]. Furthermore, several studies suggest that psychosocial,  
65 environmental, and behavioral exposures can impact TL as well[6]. Since alcohol  
66 exposure is one of the behavioral exposures as well as a source of oxidation[7]. It  
67 would be interesting to investigate the effect of alcohol consumption (AC) on  
68 telomere length.

69  
70 Alcohol is one of the most widely used recreational drugs in the world. Alcoholic  
71 drinks are classified by the International Agency for Research on Cancer (IARC) as a  
72 Group 1 carcinogen (carcinogenic to humans)[8]. IARC classifies alcoholic drink

73 consumption as a cause of colorectal, larynx, liver, esophagus, oral cavity, pharynx,  
74 and female breast cancers; and as a probable cause of pancreatic cancer[8-10]. The  
75 World Health Organization estimates that as of 2010 there were 208 million people  
76 with alcoholism worldwide[11]. AC is the world's third-largest risk factor for public  
77 health; in middle-income countries, which constitute almost half of the world's  
78 population, it is the greatest risk factor for public health[12]. Also, it could reduce a  
79 person's life expectancy by around ten years[13].

80

81 Many efforts have been made to investigate the association between AC and TL.  
82 However, no consensus has been reached yet about the AC-TL association. Some  
83 studies showed significant inverse associations between TL and alcohol use[14-16]. In  
84 other words, the more alcohol consumption, the shorter TL. However, a few studies  
85 reported significant positive associations between AC and TL. For example, Liu et al.  
86 (2009)[17] observed significantly longer TL in ever drinkers than that in never  
87 drinkers for controls of gastric cancer. Liu et al. (2011) observed significantly longer  
88 TL in ever drinkers than that in never drinkers in hepatocellular carcinoma (HCC)  
89 patients[18]. Also, several studies reported no association between AC and TL[19-30].  
90 To facilitate the investigation of the AC-TL association, we conducted a  
91 meta-analysis.

92

93

## 94 **Methods**

### 95 **Search strategy and selection criteria.**

96 This meta-analysis is based on a comprehensive and systematic search of ten research

97 databases: ProQuest, Science Online, Wiley-Blackwell, PubMed, Science Direct,  
98 Google Scholar, Nature, Baidu scholar (<http://xueshu.baidu.com/>), Chinese National  
99 Knowledge Infrastructure (CNKI, <https://en.wikipedia.org/wiki/CNKI>,  
100 <http://www.cnki.net/>), and Chongqing VIP (<http://lib.cqvip.com/>), the last three of  
101 which are Chinese research databases. Full-text available articles in English or  
102 Chinese, published or in press between January 2000 and December 2016 were  
103 considered. Since the effect of alcohol on health is usually manifested after a long  
104 time period and clinical trials (RCTs) were usually completed in a relatively  
105 short-time period, we only focused on observational studies in this meta-analysis.

106

### 107 **First round of selection.**

108 The first round of selection was based on title and abstract according to the search  
109 terms (“telomere”, “alcohol”, and “ethanol”). If either the set (“telomere” and  
110 “alcohol”) or the set (“telomere” and “ethanol”) were found in title or abstract, this  
111 article would be included for further screening.

112

### 113 **Second round of selection.**

114 When it came to the second round of selection, only papers with full text available  
115 would be kept. The papers that did not mention any association between AC and TL  
116 were also excluded. We then grouped the remaining papers based on the types of the  
117 original studies: random clinical trial or observational study.

118

### 119 **Third round of selection.**

120 Since the effect of alcohol on health is usually manifested after a long time period and

121 clinical trials (RCTs) were usually completed in a relatively short-time period, we  
122 excluded RCT studies in the third round. In the third round, we further excluded  
123 papers with low document quality.

124

125 Document quality evaluations were indispensable before any data processing, but  
126 criteria vary depending on the type of article. We applied NEWCASTLE-OTTAWA  
127 QUALITY ASSESSMENT (NOS) SCALE[31] to evaluate the quality of cohort  
128 studies and case-control studies. Meanwhile, we applied the 11-item checklist that  
129 was recommended by Agency for Healthcare Research and Quality (AHRQ) to  
130 evaluate the quality of cross-sectional studies. Based on NOS Scale, a study can be  
131 awarded a maximum of one star for each numbered item within the Selection and  
132 Outcome (for cohort studies)/Exposure (for case-control studies) categories, a  
133 maximum of two stars can be given for Comparability. The NOS ranges from zero up  
134 to nine stars[31]. According to AHRQ checklist, an item would be scored '0' if it was  
135 answered 'NO' or 'UNCLEAR'; if it was answered 'YES', then the item scored '1'.  
136 Article quality was assessed as follows: low quality = 0–3; moderate quality = 4–7;  
137 high quality = 8–11[32].

138

139 To pass the third round screening, we require that a cohort study or a case-control  
140 study needs to have NOS Scale  $\geq 6$ , and a cross-sectional study need to have AHRQ  $\geq$   
141 7.

142

143 Study selection was performed by YG and double-checked by JL and WQ. All  
144 disagreements were resolved through consensus by the three authors. The procedure  
145 of study selection is illustrated in **Fig 1**.

146 **Fig 1. The flowchart of study selection**

147

148

149 **Extraction of relevant information.**

150 After the three rounds of screening, 21 articles met the requirements and were

151 selected for further analysis. We extracted the following information relevant to the

152 present meta-analysis: study type (case-control, cohort, or cross-sectional),

153 significance of the association between AC and TL (test statistics and p-values),

154 source of the population, gender, sample size, age, ethnicity, country of the

155 participants, statistical models, quantification of TL, and quantification of AC.

156

157 **Classification of analyses.**

158 We regarded a study as a case-control study if it compared TL between two AC

159 groups (e.g., alcohol abusers versus social drinkers). We regarded a study as a cohort

160 study if it tested the association of AC measured at baseline to TL measured at the end

161 of follow-up or to the change of TL from baseline to the end of follow-up. We

162 regarded a study as a cross-sectional study if it evaluated the association of

163 continuous-type AC to TL based on data measured at the same time period (e.g., both

164 measured at the baseline or both measured at the end of follow-up).

165

166 **Statistical Analysis.**

167 The standard method to combine evidence from independent studies is the

168 meta-analysis[33], in which the weighted average of the test statistics from individual

169 studies is used to pool evidence. However, it is challenging to get appropriate test



170 statistics for the present meta-analysis. Several different statistical models were used  
171 in the related articles to test for the association of AC to TL, such as t-test and general  
172 linear regression used in case-control studies, correlation analysis and general linear  
173 regression used in cross-sectional and cohort studies. In some studies, AC was treated  
174 as continuous variable. In other studies, AC was treated as categorical variables with  
175 different categorizations (e.g., two-category, three-category, or four-category). Even  
176 for the same number of categories, the definitions of categories might also be different.  
177 For example, Pavanello et al. (2011)[14] defined three categories as 0 – 1  
178 drink-units/day; 2-4 drink-units/day; > 4 drink-units/day, while Houben et al.  
179 (2010)[23] defined three categories as 0 gram /day; 1-19 gram/day;  $\geq 20$  gram/day.  
180 Similarly, the measurements of TL also varied among the 21 articles. Most of the  
181 studies regarded TL as a continuous variable. Houben et al. (2010)[23] and Kozlitina  
182 et al. (2012)[24] categorized TL to tertiles, Weischer et al. (2014)[34] categorized TL  
183 to quartiles, while Cassidy et al. (2010)[19] categorized TL to quintiles. Hence, the  
184 interpretations of the test statistics in different studies would be different, indicating  
185 that it is not appropriate to combine test statistics. Moreover, some studies did not  
186 provide the values of test statistics. Fortunately, almost all of the studies provided  
187 p-values and sample sizes. Therefore, we performed a meta-analysis by calculating  
188 the combined p-value as pooled evidence about the association of AC to TL. If the  
189 combined p-value  $< 0.05$ , we claim that AC is significantly associated with TL.  
190 Several methods for combining p-values have been proposed. In the present study, we  
191 used Fisher's method. In addition, to utilize the information of the sample sizes, we  
192 used Liptak's method[35].  
193  
194 Since different studies used different statistical models to investigate the association

195 of AC to TL and did not report test statistics and their standard errors of the effect  
196 sizes, we could not directly access the potential publication bias and heterogeneity  
197 among studies. In this article, to roughly assess the heterogeneity, we used  
198  $-\log_{10}(\text{p-value})$  to surrogate the effect size of each study and used the inverse of  
199 sample size to surrogate the variance of the effect size. We then used  $-\log_{10}(\text{Fisher's}$   
200  $\text{combined p-value})$  and  $-\log_{10}(\text{Liptak's combined p-value})$ , respectively, as the  
201 pooled effect size to calculate  $I^2$ . To roughly assess the publication bias, we drew  
202 funnel plot by using signed  $-\log_{10}(\text{p-value})$  to surrogate the effect size and using the  
203 square root of the inverse of sample size as the standard error. The sign of the effect  
204 size for a study is the same as the sign of the test statistic. If test statistic is missing,  
205 we assumed negative sign (i.e., the higher AC, the shorter TL). R package *metafor*  
206 was used to draw the funnel plot.

207

208 In this meta-analysis, we also applied Fisher's exact test to check if the following  
209 factors affect the significance of the association between AC and TL: (1) study type  
210 (cohort study, case-control study, or cross-sectional study), (2) article goal (if testing  
211 for AC-TL association is the primary goal of the article), (3) sex-specificity (men only  
212 study, female only study, or both sex study), (4) categorization of AC (whether  
213 containing never-drinker category), and (5) study population (American, Asian,  
214 Australian, or European). For binary factors (e.g., article goal), p-values of Fisher's  
215 exact test are obtained by directly using the hypergeometric distribution. Otherwise,  
216 the network developed by Mehta and Patel (1983, 1986)[36] and improved by  
217 Clarkson, Fan, and Joe (1993)[37] was used to calculate the p-values of Fisher's exact  
218 test. We also applied two-sample Wilcoxon rank sum tests to check if sample size and  
219 mean age affect the AC-TL association.

220

221 A test is claimed as significant if its two-sided p-value  $< 0.05$ . All analyses were

222 performed by using IBM SPSS Statistics Version 22.0 or R Version 3.4.2.

223

224

## 225 **Results**

226 After the three rounds of screening, we obtained 21 articles. The information

227 (including quality scores) of these 21 articles is listed in **Table 1**. Six of the 21 articles

228 performed more than one analyses. There were 44 analyses in total that evaluated the

229 association between AC and TL in the 21 articles. The information (including quality

230 scores) of these 44 analyses is listed in **S1 Table** online. We evaluated the 27

231 independent analyses and discussed the remaining 17 analyses in the Discussion

232 section. Among the 27 analyses (**Table 1**), there are four case-control studies[14, 15,

233 17, 18], three cohort studies[16, 34, 38], and 20 cross-sectional studies[14, 16, 19-30,

234 34, 38-40]. Among the remaining 17 analyses, there are ten case-control studies, three

235 cohort studies, and four cross-sectional studies.

236

237 Since different studies used different statistical models to investigate the association

238 of AC to TL and did not report test statistics and their standard errors of the effect

239 sizes, we could not directly access the potential publication bias and heterogeneity

240 among studies. In this article, we used surrogate test statistics and surrogate standard

241 errors. If we used  $-\log_{10}$ (Fisher's combined p-value) as the pooled effect size, the

242 value of  $I^2$  is equal to 34.42, indicating small to medium heterogeneity. If we used

243  $-\log_{10}$ (Liptak's combined p-value) as the pooled effect size, the value of  $I^2$  is equal to

244 0, indicating small heterogeneity. **Fig 2** shows roughly symmetric funnel plot,  
245 indicating no publication bias.

246 **Fig 2. Funnel plot of surrogate effect size and surrogate standard error**

247

248

**Table 1 The information of the 27 independent studies**

| Study type     | First Author    | publish Year | studyDesign Original      | primary Analysis | sigAssoc | both Sex   | Pvalue | testStat | nTotal | mean Age | sepNon Drinker | continent |
|----------------|-----------------|--------------|---------------------------|------------------|----------|------------|--------|----------|--------|----------|----------------|-----------|
| crossSectional | Harris [21]     | 2006         | cross-sectional           | No               | No       | both       | 0.962  | NA       | 185    | 79.1     | N              | Europe    |
| crossSectional | Bekaert [30]    | 2007         | Longitudinal study        | No               | No       | women only | 0.682  | -7.453   | 1,291  | 45.9     | N              | Europe    |
| crossSectional | Bekaert[30]     | 2007         | Longitudinal study        | No               | No       | men only   | 0.63   | -8.033   | 1,218  | 46.1     | N              | Europe    |
| crossSectional | Hou [22]        | 2009         | case-control study        | No               | No       | both       | 0.06   | NA       | 416    | 65.5     | Y              | Europe    |
| crossSectional | Mirabello [27]  | 2009         | nested case-control study | No               | No       | men only   | 0.799  | 0.006    | 1,661  | 64       | N              | America   |
| crossSectional | Houben [23]     | 2010         | Longitudinal study        | No               | No       | men only   | 0.28   | NA       | 203    | 78.47    | Y              | Europe    |
| crossSectional | Mather [39]     | 2010         | cross-sectional           | No               | Yes      | both       | 0.008  | -0.155   | 646    | 56.75    | N              | Australia |
| crossSectional | Cassidy [19]    | 2010         | cross-sectional           | Yes              | No       | women only | 0.59   | NA       | 2,284  | 58.86    | N              | America   |
| crossSectional | Fyhrquist [20]  | 2011         | Longitudinal study        | No               | No       | women only | 0.962  | NA       | 668    | 65       | NA             | Europe    |
| crossSectional | Fyhrquist [20]  | 2011         | Longitudinal study        | No               | No       | men only   | 0.962  | NA       | 603    | 63       | NA             | Europe    |
| crossSectional | Pavanello [14]  | 2011         | case-control study        | Yes              | Yes      | men only   | 0.003  | NA       | 457    | 41       | Y              | Europe    |
| crossSectional | Strandberg [16] | 2012         | Longitudinal study        | Yes              | No       | men only   | 0.11   | -0.08    | 499    | 75.7     | N              | Europe    |
| crossSectional | Kozlitina [24]  | 2012         | Longitudinal study        | No               | No       | both       | 0.526  | NA       | 3,157  | 50       | N              | America   |
| crossSectional | Sun [29]        | 2012         | cross-sectional           | Yes              | No       | women only | 0.93   | 0.001    | 5,862  | 58.7     | N              | America   |
| crossSectional | Marcon [26]     | 2012         | cross-sectional           | No               | No       | both       | 0.962  | -0.006   | 56     | 56       | N              | Europe    |

(Continued)

**Table 1** (Continued)

| Study type            | First Author    | publish Year | studyDesign Original | primary Analysis | sigAssoc | both Sex | Pvalue  | testStat                                                                                                      | nTotal | mean Age | sepNon Drinker | continent |
|-----------------------|-----------------|--------------|----------------------|------------------|----------|----------|---------|---------------------------------------------------------------------------------------------------------------|--------|----------|----------------|-----------|
| crossSectional        | Bendix [38]     | 2014         | Longitudinal study   | No               | No       | both     | 0.078   | -0.001                                                                                                        | 2,214  | 55       | N              | Europe    |
| crossSectional        | Weischer [34]   | 2014         | Longitudinal study   | Yes              | Yes      | both     | 0.01    | NA                                                                                                            | 4,576  | 54.25    | N              | Europe    |
| crossSectional        | Latifovic [25]  | 2015         | cross-sectional      | Yes              | No       | both     | 0.57    | (coef=-0.014)+/-(se=0.046)<br>for abstainer;<br>-0.055+/-0.039 for moderate AC;<br>-0.024+/-0.050 for high AC | 477    | 35       | Y              | America   |
| crossSectional        | Starnino [28]   | 2016         | Longitudinal study   | No               | No       | both     | 0.23    | -1.205                                                                                                        | 132    | 45.34    | N              | America   |
| crossSectional cohort | Shin [40]       | 2016         | cross-sectional      | Yes              | Yes      | both     | 0.04    | NA                                                                                                            | 1,771  | 57.23    | Y              | Asia      |
| cohort                | Strandberg [16] | 2012         | Longitudinal study   | Yes              | Yes      | men only | 0.004   | -0.13                                                                                                         | 499    | 46.7     | N              | Europe    |
| cohort                | Bendix [38]     | 2014         | Longitudinal study   | No               | Yes      | both     | 0.032   | -0.001                                                                                                        | 1,356  | 44.7     | N              | Europe    |
| cohort                | Weischer [34]   | 2014         | Longitudinal study   | Yes              | No       | both     | 0.61    | -0.154                                                                                                        | 4,535  | 54.25    | N              | Europe    |
| case-control          | Liu [17]        | 2009         | case-control study   | No               | Yes      | both     | 0.016   | meanDiff=0.07                                                                                                 | 378    | 53       | Y              | Asia      |
| case-control          | Pavanello [14]  | 2011         | case-control study   | Yes              | Yes      | men only | 0.00009 | NA                                                                                                            | 457    | 38       | Y              | Europe    |
| case-control          | Aida [15]       | 2011         | case-control study   | Yes              | Yes      | both     | 0.002   | NA                                                                                                            | 50     | 67.25    | Y              | Asia      |
| case-control          | Liu [18]        | 2011         | case-control study   | No               | Yes      | both     | 0.043   | meanDiff=0.04                                                                                                 | 240    | 50.5     | Y              | Asia      |

N, No; Y=Yes, NA=Not Available (i.e., missing value); studytype, indicating the study type of the AC-TL association; firstAuthor, indicating the last name of the first author; publishYear, indicating the article publication year; studyDesignOriginal, indicating the original study design of

the article; primaryAnalysis, indicating if the primary goal of the study is to investigate the AC-TL association; sigAssoc, indicating if the AC-TL association is significant (\* $p < 0.05$ ); bothSex, indicating if the AC-TL association study is based on women-only data, men-only data, or based on both women and men data; pvalue, the p-value for testing the AC-TL association; testStat, test statistic; nTotal, the number of total sample size in the AC-TL association study; meanAge, mean age of subjects in the AC-TL association study; sepNonDrinker, indicating if the AC-TL association study includes a non-drinker category; continent, indicating which continent the subjects were from.

249 Among the 27 studies, 11 studies have primary goals to detect the AC-TL association.

250 Among the 11 studies, two were cohort studies[16, 34], two were case-control

251 studies[14, 15], and seven were cross-sectional studies[14, 16, 19, 25, 29, 34, 40]. The

252 other 16 studies had various primary goals, from the association between TL and red

253 blood cell size[24] to the association between TL and mortality in humans[38].

254

255 As for sex-specificity, eight studies are men only studies[14, 16, 20, 23, 27, 30], four

256 studies are women only studies[19, 20, 29, 30], and 15 studies contain both men and

257 women[15, 17, 18, 21, 22, 24-26, 28, 34, 38-40]. As for the categorization of AC, nine

258 studies have the category of non-alcohol drinkers[14, 15, 17, 18, 22, 23, 25, 40], while

259 two studies did not provide this information[20]. As for study population, 16 studies

260 were based on populations in Europe[14, 16, 20-23, 26, 30, 34, 38], six studies were

261 based on populations in America[19, 24, 25, 27-29], four studies were based on

262 Asian[15, 17, 18, 40], and one study was based on Australian[39]. The range of total

263 number of samples among the 27 articles is from 50[15] to 5862[29]. The mean age is

264 ranged from 35 year old[25] to 79 year old[21]. The p-value is ranged from 9.00E-5 to

265 0.962.

266

267 Ten out of the 27 studies reported significant associations between AC and TL (i.e.,

268 p-value < 0.05). The Fisher's combined p-value of the 27 studies is 5.75E-8 and the

269 Liptak's combined p-value is 8.76E-3.

270

271 Two out of the three cohort studies and all four case-control studies reported

272 significant AC-TL associations, while only four out of the 20 (20%) cross-sectional

273 studies reported significant AC-TL associations. For the association between study



274 type and AC-TL association, the cross-table is in **S2 Table** online and the parallel pie  
275 chart is in **Fig 3**. Fisher's exact tests showed that study type is significantly associated  
276 with the significance of AC-TL association (p-value=1.86E-3).

277 **Fig 3. Parallel pie chart: The association between study type and AC-TL**  
278 **association**

279

280

281 All six studies from America reported non-significance of the AC-TL association,  
282 while all four studies from Asia and the only one study from Australia reported  
283 significant AC-TL association. Five out of 16 studies from Europe reported  
284 significant AC-TL association. For the association between continent and AC-TL  
285 association, the cross-table is in **S3 Table** online and the parallel pie chart is in **Fig 4**.  
286 Fisher's exact test showed that study population (p-value = 2.67E-3) is significantly  
287 associated with the significance of the AC-TL association.

288 **Fig 4. Parallel pie chart: The association between continent and AC-TL**  
289 **association**

290

291

292 The significance of AC-TL association is not related to whether a study's primary  
293 goal is to test for AC-TL association (p-value=0.22), whether a study is based only on  
294 men, only on women, or on both men and women (p-value=0.39), or whether a study  
295 has an AC category: never drinker (p-value=0.09). Cross-tables of the association  
296 between these factors and AC-TL association are in **S4-S6 Tables** online,  
297 respectively.

298

299 Wilcoxon rank sum tests showed that both the total number of sample size  
300 (p-value=0.51) and mean age (p-value=0.11) are not associated with the significance  
301 of AC-TL association. Parallel boxplots of the association between these factors and  
302 AC-TL association are in **S1** and **S2 Figs** online.

303

304

## 305 **Discussion**

306 In this article, we conducted a meta-analysis to summarize the pieces of evidence in  
307 the literature of observational studies about the association between alcohol  
308 consumption (AC) and telomere length (TL), and to identify factors that might affect  
309 the significance of the AC-TL association. There are 21 eligible articles included in  
310 this meta-analysis, containing 44 studies of the AC-TL association. The pooled  
311 evidence from the 27 independent studies showed that AC is significantly associated  
312 with TL (Fisher's combined p-value=3.52E-8; Liptak's combined p-value=8.24E-3).  
313 Study type (p-value=1.86E-3) and study population (p-value=2.67E-3) are  
314 significantly associated with the significance of the AC-TL association.

315

316 Using all 44 studies and ignoring the dependency among the 44 studies, The AC-TL  
317 association still remained significant (Fisher's combined p-value=1.11E-16 and  
318 Liptak's combined p-value=3.57E-5).

319

320 If we considered only the four case-control studies and the 20 cross-sectional studies,  
321 whether or not having an AC category "never drinker" is significantly associated with  
322 the significance of the AC-TL association (p-value=0.026). All four case-control  
323 studies reported significant AC-TL associations, while only four out of 20

324 cross-sectional studies reported significant AC-TL association. By observing that the  
325 controls in all four case-control studies are never drinkers and that only five out of the  
326 20 cross-sectional studies had the never-drinker category, we guess that the effect of  
327 study type on the significance of the AC-TL association is probably due to the  
328 comparison of ever drinkers to never drinkers. Parallel pie chart and the cross-table of  
329 the association between whether a study has an AC category as never-drinker and the  
330 AC-TL association are in **S3 Fig** and **S7 Table** online.

331

332 Since there is only one study from Australia, we regroup study population to four Asia  
333 studies and 23 non-Asia studies; the study population is still significantly associated  
334 with the significance of the AC-TL association (p-value=0.012). Parallel pie chart and  
335 the cross-table of the association between whether the population of a study was  
336 Asian and the AC-TL association are in **S4 Fig** and **S8 Table** online. It would be  
337 interesting to investigate why all four studies from Asia reported significant AC-TL  
338 association.

339

340 It is interesting to observe that all four women-only studies reported non-significant  
341 associations between AC-TL, although sex-specificity is not significantly associated  
342 with the significance of the AC-TL association (p-value=0.3948). More women-only  
343 studies are needed to confirm if this observation is by chance or not.

344

345 Theoretically, longitudinal study (cohort study) would be better than cross-sectional  
346 study or case-control study in that cohort study could infer if heavy alcohol  
347 consumption causes shorter telomere length. However, there are several challenges  
348 for cohort studies[38]. First, it would be hard to make sure the procedure to measure

349 TL at the end of long follow-up is the same as that at the baseline. Second, the blood  
350 storage method would also be different between baseline and the end of follow-up.  
351 Third, it would be difficult to make sure TL technically behaves in the same manner  
352 at baseline as that at the end of follow-up.

353

354 Genetics may play an important role in the AC-TL association. Pavanello et al. (2011)  
355 showed that carriers of the common ADH1B\*1/\*1 (rs1229984) genotype were more  
356 likely to be alcohol abusers, while exhibiting shorter TL[14]. Shin et al. (2016)  
357 showed that heavy alcohol consumption was inversely associated with leukocyte TL  
358 only among carriers of the mutant alleles (CT and TT) of rs2074356 (ALDH2)[40].  
359 These studies indicate genetics could help identify subtypes of subjects that have  
360 significant AC-TL associations.

361

362 Several studies only provided lower or upper boundaries of p-values. For instance,  
363 when evaluating the effect of interaction between AC and ADH1B genotypes on TL  
364 among 255 controls, Pavanello et al. (2011) showed that the p-value  $< 0.001$ [14].  
365 Pavanello et al. (2011) showed p-values  $< 0.0001$  for another four studies[14]. Harris  
366 et al. (2006) showed p-value  $> 0.05$ [21]. When we calculated Fisher's combined  
367 p-value and Liptak's weighted p-value, we set p-value = 0.0009 for the study with  
368 p-value  $< 0.001$ , set p-value = 0.00009 for the four studies with p-value  $< 0.0001$ , and  
369 set p-value = 0.962 (the maximum p-value among the 44 studies) for the study with  
370 p-value  $> 0.05$ .

371

372 Several studies provided mean age only for each group of subjects (e.g., for each TL  
373 tertile in Houben et al. (2010)[23]). We took the average of the means of these groups

374 when we investigated if age would affect the significance of the AC-TL association.

375

376 Six of the 21 articles included more than one study that investigated the association  
377 between AC and TL. Among the 27 studies, two studies (one is men only study and  
378 the other is women-only study) were from Bekaert et al. (2007)[30]. The same is for  
379 Fyhrquist et al. (2011)[20]. Pavanello et al. (2011) included two studies: one is  
380 case-control study, and the other is cross-sectional study[14]. Stranberg et al. (2012)  
381 and Weischer (2014) both included two studies: one is cross-sectional study, and the  
382 other is cohort study[16, 34]. We assumed that the significance of the AC-TL  
383 association in different types of studies within the same article is independent.

384

385 The quantifications of TL are quite different among the 27 analyses. Sixteen analyses  
386 quantified TL as proportion or ratio. Among the 16 analyses, one study used  
387 normalized telomere-to-centromere ratio (NTCR)[15] and fifteen studies used the  
388 relative telomere to single copy gene (T/S) ratio[14, 17-19, 22, 25, 27, 28, 34, 38-40].  
389 One study assessed TL with Z-score of T/S ratio[29]. One study assessed TL by  
390 terminal restriction fragment (TRF)[26]. Nine analyses used kilobase (kb) as the unit  
391 of TL. Three analyses divided TL into three[23, 24] or four categories[34]. Three  
392 analyses took the logarithm of TL[20, 40]. The difference in the TL quantification  
393 makes it difficult to aggregate data and interpret results. In future, it would be  
394 beneficial to have guidance on how to standardize the quantification of TL.

395

396 The quantifications of AC are also quite different among the 27 analyses.  
397 Twenty-three analyses measured AC on a continuous scale as alcoholic beverages per  
398 week[17, 21, 25, 28, 30, 38, 39], beverages per day[14, 29, 34], grams (g) per

399 week[16], and g per day[18, 19, 23, 24, 26, 27, 40]. Among them, a standard alcoholic  
400 beverage widely varied from 12 oz. beer (1 bottle), 5 oz. wine (1 glass), 1.5 oz. liquor,  
401 to 12 g alcohol. One analysis measured AC as total drink-years (yearly frequency \*  
402 total years of alcohol use)[22]. Other studies used categorized AC. One defined an  
403 ever-drinker as a person drinking at least one serving of beer (12 oz.), wine (4 oz.), or  
404 liquor (1.5 oz.) per month for  $\geq 6$  months, while a study used a four-category AC  
405 categorization: nondrinker, <10, 10-29, and >29 years of drinking alcohol[22]. Two  
406 analyses took the natural logarithm of AC[30]. Three analyses did not report the  
407 quantifications of AC[15, 20]. In future, it would be beneficial to have guidance on  
408 how to standardize the quantification of AC.

409

410 Among the 27 main studies investigated in the present study, 15 studies reported test  
411 statistic values, four of which reported positive associations between AC and TL[17,  
412 18, 27, 29]. That is, the more alcohol consumption is, the longer telomere length is.  
413 Two of the four positive associations are statistically significant[17, 18]. Liu et al.  
414 (2009)[17] gave a potential explanation the significant positive association:  
415 telomerase activation by alcohol drinking in target tissues. They also mentioned that  
416 they could not rule out the possibility of chance findings because of the limited size in  
417 each subgroup[17]. We hypothesize that the positive AC-TL association is due to  
418 moderate drinking, which is beneficial to human health. However, Liu et al. (2009)  
419 did not mention how they defined “ever drinkers”[17]. Further investigation is  
420 warranted to study the differences of the AC-TL association among never drinkers,  
421 moderate drinkers, and heavy drinkers.

422

423 In summary, the present meta-analysis aggregated the p-values of 27 related studies

424 (total sample size 35,891) and showed a significant association between alcohol  
425 consumption and telomere length based on Fisher's combined p-value and Liptak's  
426 weighted p-value, although the different quantification methods of AC and TL  
427 hindered the use of meta-analysis to aggregate the evidence for the AC-TL association.  
428 Factors, such as study type (case-control, cross-sectional, or cohort study), study  
429 population (American, Asian, or European), and subject gender, might affect the  
430 AC-TL association. In future, it would help us uncover the true relationship between  
431 alcohol consumption and telomere length if we standardize the quantifications of AC  
432 and TL and if we take account for both beneficial and deteriorating effects of AC to  
433 human health.

434

435

## 436 **Supporting information**

437 **S1 Fig. Parallel boxplots of the association between total number of sample size**  
438 **and AC-TL association.**

439 (PDF)

440 **S2 Fig. Parallel boxplots of the association between mean age and AC-TL**  
441 **association.**

442 (PDF)

443 **S3 Fig. Parallel pie chart: The association between whether a study has an AC**  
444 **category as never-drinker and the AC-TL association (no cohort).**

445 (PDF)

446 **S4 Fig. Parallel pie chart: The association between whether the population of a**  
447 **study was Asian and the AC-TL association**

448 (PDF)

449 **S1 Checklist. PRISMA checklist.**

450 (DOC)

451 **S1 Table. The information of the 44 analyses in the 21 articles.**

452 (xlsx)

453 **S2 Table. Cross table: The relationship between study type and the significance**

454 **of the AC-TL association. Note: ratio: the ratio of number of studies with**

455 **significant AC-TL association to the number of total studies**

456 (xlsx)

457 **S3 Table. Cross table: The relationship between continent and the significance of**

458 **the AC-TL association.**

459 (xlsx)

460 **S4 Table. Cross table: The relationship between a study's primary goal and the**

461 **significance of the AC-TL association.**

462 (xlsx)

463 **S5 Table. Cross table: The relationship between gender of a study's participants**

464 **and the significance of the AC-TL association.**

465 (xlsx)

466 **S6 Table. Cross table: The relationship between whether a study has an AC**

467 **category as never-drinker and the significance of the AC-TL association.**

468 (xlsx)

469 **S7 Table. Cross table: The relationship between whether a study has an AC**

470 **category as never-drinker and the significance of the AC-TL association (cohort**

471 **study excluded).**

472 (xlsx)



473 **S8 Table. Cross table: The relationship between whether the population of a**  
474 **study was Asian and the significance of the AC-TL association.**

475 (xlsx)

476

477 **Author Contributions**

478 **Conceptualization:** Jianqiang Li, Ji-Jiang Yang, Weiliang Qiu.

479 **Data curation:** Yu Guan, Faheem Akhtar, Xi Xu.

480 **Investigation:** Yu Guan, Jianqiang Li, Weiliang Qiu.

481 **Methodology:** Jianqiang Li, Ji-Jiang Yang, Weiliang Qiu.

482 **Project administration:** Jianqiang Li, Ji-Jiang Yang.

483 **Software:** Yu Guan, Faheem Akhtar, Xi Xu.

484 **Supervision:** Shi Chen, Qing Wang, Hui Pan.

485 **Validation:** Yu Guan, Weiliang Qiu.

486 **Writing - original draft:** Faheem Akhtar, Xi Xu, Shi Chen, Qing Wang, Hui Pan.

487 **Writing - review & editing:** Shi Chen, Qing Wang, Hui Pan.

488

489

490

## 491 **References**

- 492 1. Wong J, Collins K. Telomere maintenance and disease. *Lancet*. 2003;362(9388):983–8.
- 493 2. Hayashi MT, Cesare AJ, Rivera T, Karlseder J. Cell death during crisis is mediated by mitotic
- 494 telomere deprotection. *Nature*. 2015;522(7557):492–6.
- 495 3. Blasco MA. Telomeres and human disease: ageing, cancer and beyond. *Nat Rev Genet*.
- 496 2005;6:611–22.
- 497 4. Londoño-Vallejo JA. Telomere instability and cancer. *Biochimie*. 2008;90(1):73-82.
- 498 5. Zglinicki Tv. Replicative senescence and the art of counting. *Exp Gerontol*.
- 499 2003;38(11-12):1259–64.
- 500 6. Ornish D, Lin J, Chan JM, Epel E, Kemp C, Weidner G, et al. Effect of comprehensive lifestyle
- 501 changes on telomerase activity and telomere length in men with biopsy-proven low-risk prostate
- 502 cancer: 5-year follow-up of a descriptive pilot study. *Lancet Oncol*. 2013;14(11):1112–20.
- 503 7. Wu D, Cederbaum AI. Alcohol, Oxidative Stress, and Free Radical Damage. *Alcohol Res Health*.
- 504 2003;27(4):277–84.
- 505 8. Secretan B, Straif K, Baan R, Grosse Y, Ghissassi FE, Bouvard V, et al. A review of human
- 506 carcinogens--Part E: tobacco, areca nut, alcohol, coal smoke, and salted fish. *Lancet Oncol*.
- 507 2009;10(11):1033–4.
- 508 9. Bagnardi V, Rota M, Botteri E, Tramacere I, Islami F, Fedirko V, et al. Alcohol consumption and
- 509 site-specific cancer risk: a comprehensive dose–response meta-analysis. *Br J Cancer*.
- 510 2014;112(3):580–93.
- 511 10. Smyth A, Teo KK, Rangarajan S, O'Donnell M, Zhang X, Rana P, et al. Alcohol consumption and
- 512 cardiovascular disease, cancer, injury, admission to hospital, and mortality: a prospective cohort study.
- 513 *Lancet*. 2015;386(10007):1945–54.
- 514 11. DESA UN. Global Population Estimates by Age, 1950–2050. United Nations, Department of
- 515 Economic and Social Affairs, 2013.
- 516 12. World Health Organization. Global Status Report on Alcohol and Health. Geneva, Switzerland:
- 517 World Health Organization, 2011.
- 518 13. Schuckit MA. Recognition and management of withdrawal delirium (delirium tremens). *N Engl J*
- 519 *Med*. 2014;371(22):2109–13.
- 520 14. Pavanello S, Hoxha M, Dioni L, Bertazzi PA, Sneghi R, Nalesso A, et al. Shortened telomeres in
- 521 individuals with abuse in alcohol consumption. *Int J Cancer*. 2011;129(4):983–92.
- 522 15. Aida J, Yokoyama A, Izumiyama N, Nakamura K, Ishikawa N, Poon SS, et al. Alcoholics show
- 523 reduced telomere length in the oesophagus. *J Pathol*. 2011;223(3):410–6.
- 524 16. Strandberg TE, Strandberg AY, Saijonmaa O, Tilvis RS, Pitkala KH, Fyhrquist F. Association
- 525 between alcohol consumption in healthy midlife and telomere length in older men. The Helsinki
- 526 Businessmen Study. *Eur J Epidemiol*. 2012;27(10):815–22.
- 527 17. Liu X, Bao G, Huo T, Wang Z, He X, Dong G. Constitutive telomere length and gastric cancer risk:
- 528 case-control analysis in Chinese Han population. *Cancer Sci*. 2009;100(7):1300–5.
- 529 18. Liu J, Yang Y, Zhang H, Zhao S, Liu H, Ge N, et al. Longer leukocyte telomere length predicts
- 530 increased risk of hepatitis B virus-related hepatocellular carcinoma: a case-control analysis. *Cancer*.
- 531 2011;117(18):4247–56.
- 532 19. Cassidy A, De Vivo I, Liu Y, Han J, Prescott J, Hunter DJ, et al. Associations between diet, lifestyle
- 533 factors, and telomere length in women. *Am J Clin Nutr*. 2010;91(5):1273–80.
- 534 20. Fyhrquist F, Silventoinen K, Saijonmaa O, Kontula K, Devereux RB, de Faire U, et al. Telomere
- 535 length and cardiovascular risk in hypertensive patients with left ventricular hypertrophy: the LIFE
- 536 study. *J Hum Hypertens*. 2011;25(12):711–8.
- 537 21. Harris SE, Deary IJ, MacIntyre A, Lamb KJ, Radhakrishnan K, Starr JM, et al. The association
- 538 between telomere length, physical health, cognitive ageing, and mortality in non-demented older
- 539 people. *Neurosci Lett*. 2006;406(3):260–4.
- 540 22. Hou L, Savage SA, Blaser MJ, Perez-Perez G, Hoxha M, Dioni L, et al. Telomere Length in
- 541 Peripheral Leukocyte DNA and Gastric Cancer Risk. *Cancer Epidemiol Biomarkers Prevent*.
- 542 2009;18(11):3103–9.
- 543 23. Houben JM, Giltay EJ, Rius-Ottenheim N, Hageman GJ, Kromhout D. Telomere length and
- 544 mortality in elderly men: the Zutphen Elderly Study. *J Gerontol A Biol Sci Med Sci*. 2011;66(1):38–44.

- 545 24. Kozlitina J, Garcia CK. Red blood cell size is inversely associated with leukocyte telomere length in  
546 a large multi-ethnic population. *PLoS one*. 2012;7(12):e51046.
- 547 25. Latifovic L, Peacock SD, Massey TE, King WD. The Influence of Alcohol Consumption, Cigarette  
548 Smoking, and Physical Activity on Leukocyte Telomere Length. *Cancer Epidemiol Biomarkers Prevent*.  
549 2016;25(2):374–80.
- 550 26. Marcon F, Siniscalchi E, Crebelli R, Saieva C, Sera F, Fortini P, et al. Diet-related telomere  
551 shortening and chromosome stability. *Mutagenesis*. 2012;27(1):49–57.
- 552 27. Mirabello L, Huang WY, Wong JY, Chatterjee N, Reding D, Crawford ED, et al. The association  
553 between leukocyte telomere length and cigarette smoking, dietary and physical variables, and risk of  
554 prostate cancer. *Aging cell*. 2009;8(4):405–13.
- 555 28. Starnino L, Busque L, Tardif JC, D'Antonio B. Psychological Profiles in the Prediction of Leukocyte  
556 Telomere Length in Healthy Individuals. *PLoS one*. 2016;11(10):e0165482.
- 557 29. Sun Q, Shi L, Prescott J, Chiuve SE, Hu FB, De Vivo I, et al. Healthy lifestyle and leukocyte  
558 telomere length in U.S. women. *PLoS one*. 2012;7(5):e38374.
- 559 30. Bekaert S, Meyer TD, Rietzschel ER, Buyzere MLD, Bacquer DD, Langlois M, et al. Telomere  
560 length and cardiovascular risk factors in a middle-aged population free of overt cardiovascular disease.  
561 *Aging cell*. 2007;6(5):639–47.
- 562 31. Stang A. Critical evaluation of the Newcastle-Ottawa scale for the assessment of the quality of  
563 nonrandomized studies in meta-analyses. *Eur J Epidemiol*. 2010;25(9):603–5.
- 564 32. Hu J, Dong Y, Chen X, Liu Y, Ma D, Liu X, et al. Prevalence of suicide attempts among Chinese  
565 adolescents: A meta-analysis of cross-sectional studies. *Compr Psychiatry*. 2015;61:78–89.
- 566 33. DerSimonian R, Laird N. Meta-analysis in clinical trials. *Controlled Clin Trials*. 1986;7(3):177–88.
- 567 34. Weischer M, Bojesen SE, Nordestgaard BG. Telomere shortening unrelated to smoking, body  
568 weight, physical activity, and alcohol intake: 4,576 general population individuals with repeat  
569 measurements 10 years apart. *PLoS Genetics*. 2014;10(3):e1004191.
- 570 35. Won S, Morris N, Lu Q, Elston RC. Choosing an optimal method to combine P-values. *Stat Med*.  
571 2009;28(11):1537–53.
- 572 36. Mehta CR, Patel NR. A network algorithm for performing Fisher's exact test in  $r \times c$  contingency  
573 tables. *J Am Stat Assoc*. 1983; 78:427–34.
- 574 37. Clarkon DB, Fan Y-a, Joe H. A Remark on Algorithm 643: FEXACT: An Algorithm for Performing  
575 Fisher's Exact Test in  $r \times c$  Contingency Tables. *ACM Trans Math Softw*. 1993;19:484–8.
- 576 38. Bendix L, Thinggaard M, Fenger M, Kolvraa S, Avlund K, Linneberg A, et al. Longitudinal changes  
577 in leukocyte telomere length and mortality in humans. *J Gerontol A Biol Sci Med Sci*.  
578 2014;69(2):231–9.
- 579 39. Mather KA, Jorm AF, Milburn PJ, Tan X, Easteal S, Christensen H. No associations between  
580 telomere length and age-sensitive indicators of physical function in mid and later life. *J Gerontol A Biol  
581 Sci Med Sci*. 2010;65(8):792–9.
- 582 40. Shin C, Baik I. Associations Between Alcohol Consumption and Leukocyte Telomere Length  
583 Modified by a Common Polymorphism of ALDH2. *Alcohol Clin Exp Res*. 2016;40(4):765–71.
- 584

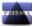

# PRISMA 2009 Flow Diagram

Identification

Screening

Eligibility

Included

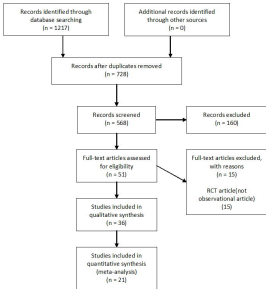



AC-TL association is significant

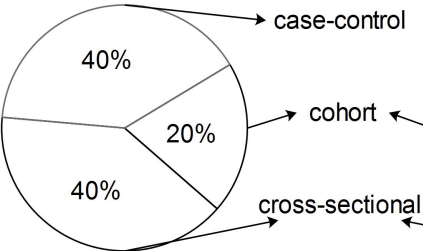

AC-TL association is not significant

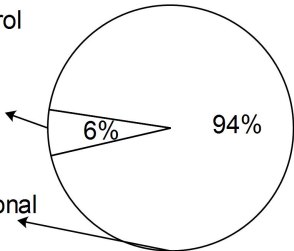

AC-TL association is significant

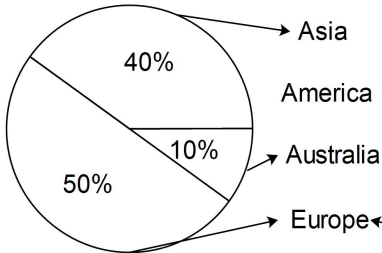

AC-TL association is not significant

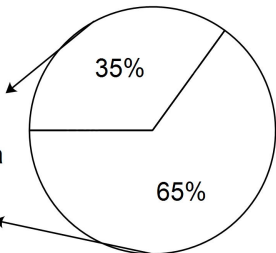

Source: https://www.biorxiv.org/content/10.1101/374280v1.full.pdf
